# Supplementary material
Source: ML conference proceedings conference paper supplement (https://openreview.net/forum?id=OvPnc5kVsb)
Supplement: supplementary_material [file attachment]

424 **A Appendix**

425 **A.1 Considerations for Sampling Around the Offline Dataset**

426 In this subsection, we explore an alternative sampling strategy for the pseudo-labeling process. Instead  
 427 of generating new samples around the current optimization point, this strategy generates samples  
 428 directly around the offline dataset  $\mathcal{D}$ . To ascertain the effectiveness of our chosen strategy against this  
 429 alternative, we perform experiments on two tasks: D’Kitty (continuous) and TF8 (discrete).

430 Table 4 showcases the results. For both tasks, our strategy consistently yields higher scores, affirming  
 431 its superior performance over the alternative. The advantage of our chosen strategy can be attributed  
 432 to its dynamic nature. By sampling around the current optimization point, we gather more insightful  
 433 information for the local fine-tuning of the proxy. This strategy allows the co-teaching process to  
 434 adapt and evolve according to the optimization trajectory, leading to improved performances.

Table 4: Comparison of Sampling Strategies.

| Method  | Sampling along Gradient Path ( <b>Ours</b> ) | Sampling from $\mathcal{D}$ |
|---------|----------------------------------------------|-----------------------------|
| TF8     | <b>0.958 ± 0.008</b>                         | 0.871 ± 0.067               |
| D’Kitty | <b>0.968 ± 0.020</b>                         | 0.955 ± 0.006               |

435 **A.2 Comparative Performance Analysis using Median Scores**

436 In addition to the maximum scores discussed in the main paper, we also present the median (50<sup>th</sup>  
 437 percentile) scores across all seven tasks. The best design in the offline dataset, denoted as  $\mathcal{D}(\mathbf{best})$ ,  
 438 along with the mean and median rankings are provided for comprehensive comparison.

439 **Performance in Continuous Tasks.** Table 5 illustrates the performances of ICT compared with other  
 440 methods in continuous tasks. It is noteworthy that ICT exhibits performance on par with the best-  
 441 performing methods. Compared with the vanilla gradient ascent (Grad), ICT demonstrates superior  
 442 performance, thus affirming its effectiveness in addressing out-of-distribution issues. Moreover, ICT  
 443 is generally better than the mean ensemble (Mean), which demonstrates the effectiveness of our  
 444 strategy. These results support the use of ICT as a robust baseline for offline MBO.

Table 5: Experimental results on continuous tasks for comparison (median).

| Method                       | Superconductor       | Ant Morphology       | D’Kitty Morphology   | Hopper Controller    |
|------------------------------|----------------------|----------------------|----------------------|----------------------|
| $\mathcal{D}(\mathbf{best})$ | 0.399                | 0.565                | 0.884                | 1.0                  |
| BO-qEI                       | 0.300 ± 0.015        | 0.567 ± 0.000        | <b>0.883 ± 0.000</b> | 0.343 ± 0.010        |
| CMA-ES                       | 0.379 ± 0.003        | -0.045 ± 0.004       | 0.684 ± 0.016        | -0.033 ± 0.005       |
| REINFORCE                    | <b>0.463 ± 0.016</b> | 0.138 ± 0.032        | 0.356 ± 0.131        | -0.064 ± 0.003       |
| CbAS                         | 0.111 ± 0.017        | 0.384 ± 0.016        | 0.753 ± 0.008        | 0.015 ± 0.002        |
| Auto.CbAS                    | 0.131 ± 0.010        | 0.364 ± 0.014        | 0.736 ± 0.025        | 0.019 ± 0.008        |
| MIN                          | 0.336 ± 0.016        | <b>0.618 ± 0.040</b> | <b>0.887 ± 0.004</b> | 0.352 ± 0.058        |
| Grad                         | 0.321 ± 0.010        | 0.559 ± 0.032        | 0.856 ± 0.009        | 0.354 ± 0.010        |
| Mean                         | 0.334 ± 0.003        | 0.569 ± 0.010        | 0.876 ± 0.003        | 0.386 ± 0.003        |
| Min                          | 0.354 ± 0.026        | 0.571 ± 0.011        | <b>0.883 ± 0.000</b> | 0.359 ± 0.004        |
| COMs                         | 0.316 ± 0.026        | 0.560 ± 0.002        | 0.879 ± 0.002        | 0.341 ± 0.009        |
| ROMA                         | 0.372 ± 0.019        | 0.479 ± 0.041        | 0.853 ± 0.007        | 0.389 ± 0.005        |
| NEMO                         | 0.318 ± 0.008        | <b>0.592 ± 0.000</b> | 0.880 ± 0.000        | 0.355 ± 0.002        |
| BDI                          | 0.412 ± 0.000        | 0.474 ± 0.000        | 0.855 ± 0.000        | <b>0.408 ± 0.000</b> |
| IOM                          | 0.352 ± 0.021        | 0.509 ± 0.033        | 0.876 ± 0.006        | 0.370 ± 0.009        |
| <b>ICT<sub>(ours)</sub></b>  | 0.399 ± 0.012        | <b>0.592 ± 0.025</b> | 0.874 ± 0.005        | 0.362 ± 0.004        |

445 **Performance in Discrete Tasks.** The median scores for discrete tasks are reported in Table 6.  
 446 ICT consistently demonstrates high performance for both TF Bind 8 and TF Bind 10. However,  
 447 for the NAS task, which has a higher dimensionality than the two tasks, the optimization process  
 448 becomes notably more complex. Further, the simplistic encoding-decoding strategy employed in the  
 449 design bench may not accurately capture the intricacies of the neural network’s accuracy, potentially  
 450 contributing to ICT’s suboptimal performance on the NAS task.

Table 6: Experimental results on discrete tasks &amp; ranking on all tasks for comparison (median).

| Method                      | TF Bind 8                           | TF Bind 10                          | NAS                                 | Rank Mean     | Rank Median |
|-----------------------------|-------------------------------------|-------------------------------------|-------------------------------------|---------------|-------------|
| $\mathcal{D}$ (best)        | 0.439                               | 0.467                               | 0.436                               |               |             |
| BO-qEI                      | $0.439 \pm 0.000$                   | $0.467 \pm 0.000$                   | $0.544 \pm 0.099$                   | 7.7/15        | 8/15        |
| CMA-ES                      | $0.537 \pm 0.014$                   | $0.484 \pm 0.014$                   | <b><math>0.591 \pm 0.102</math></b> | 8.4/15        | 6/15        |
| REINFORCE                   | $0.462 \pm 0.021$                   | $0.475 \pm 0.008$                   | $-1.895 \pm 0.000$                  | 10.9/15       | 14/15       |
| CbAS                        | $0.428 \pm 0.010$                   | $0.463 \pm 0.007$                   | $0.292 \pm 0.027$                   | 12.9/15       | 13/15       |
| Auto.CbAS                   | $0.419 \pm 0.007$                   | $0.461 \pm 0.007$                   | $0.217 \pm 0.005$                   | 13.4/15       | 13/15       |
| MIN                         | $0.421 \pm 0.015$                   | $0.468 \pm 0.006$                   | $0.433 \pm 0.000$                   | 7.7/15        | 9/15        |
| Grad                        | $0.528 \pm 0.021$                   | $0.519 \pm 0.017$                   | $0.438 \pm 0.110$                   | 7.7/15        | 8/15        |
| Mean                        | $0.539 \pm 0.030$                   | <b><math>0.539 \pm 0.010</math></b> | $0.494 \pm 0.077$                   | 5.3/15        | 5/15        |
| Min                         | <b><math>0.569 \pm 0.050</math></b> | $0.485 \pm 0.021$                   | <b><math>0.567 \pm 0.006</math></b> | <b>3.7/15</b> | 4/15        |
| COMs                        | $0.439 \pm 0.000$                   | $0.467 \pm 0.002$                   | $0.525 \pm 0.003$                   | 8.4/15        | 8/15        |
| ROMA                        | <b><math>0.555 \pm 0.020</math></b> | $0.512 \pm 0.020$                   | $0.525 \pm 0.003$                   | 5.6/15        | 5/15        |
| NEMO                        | $0.438 \pm 0.001$                   | $0.454 \pm 0.001$                   | <b><math>0.564 \pm 0.016</math></b> | 7.7/15        | 7/15        |
| BDI                         | $0.439 \pm 0.000$                   | $0.476 \pm 0.000$                   | $0.517 \pm 0.000$                   | 6.7/15        | 8/15        |
| IOM                         | $0.439 \pm 0.000$                   | $0.477 \pm 0.010$                   | $-0.050 \pm 0.011$                  | 7.9/15        | 7/15        |
| <b>ICT<sub>(ours)</sub></b> | <b><math>0.551 \pm 0.013</math></b> | <b><math>0.541 \pm 0.004</math></b> | $0.494 \pm 0.091$                   | 4.3/15        | <b>3/15</b> |

451 **Summary.** ICT excels by achieving the best median ranking and a top-two mean ranking. These  
452 rankings consolidate ICT’s standing as a strong method for both continuous and discrete tasks.

### 453 A.3 Hyperparameter Setting

454 We report the details of hyperparameters in our experiments. The number of iterations,  $T$ , is set  
455 to 200 for continuous tasks and 100 for discrete tasks. For most continuous and discrete tasks, we  
456 employ the Adam optimizer [32] to fine-tune the proxies. The learning rates are set at  $1e - 3$  and  
457  $1e - 1$  for continuous tasks and discrete tasks, respectively. In the case of the Hopper Controller  
458 task, the input dimension is significantly larger, at 5126, and we adopt a smaller learning rate  $1e - 4$   
459 for fine-tuning to ensure stability of the optimization process. Regarding the learning rate for the  
460 meta-learning framework, we use the Adam optimizer [32] with a learning rate  $2e - 1$  for continuous  
461 tasks and  $3e - 1$  for discrete tasks, respectively.

### 462 A.4 Analysis of Co-teaching and Sample Reweighting Efficacy

463 In our analysis, we focus on two key steps of our method: (1) pseudo-label-driven co-teaching and  
464 (2) meta-learning-based sample reweighting. We evaluate the efficacy of these steps by comparing  
465 generated samples with their corresponding ground truth. It’s important to note that during the training  
466 phase, ground-truth scores are inaccessible to all algorithms and are used strictly for evaluation. Our  
467 method incorporates three proxies  $f_{\theta_1}(\cdot)$ ,  $f_{\theta_2}(\cdot)$ , and  $f_{\theta_3}(\cdot)$ . We employ  $f_{\theta_1}(\cdot)$  for pseudo-labeling  
468 and  $f_{\theta_2}(\cdot)$ ,  $f_{\theta_3}(\cdot)$  for co-teaching. We run ICT over 50 time steps for both D’Kitty (continuous) and  
469 TF8 (discrete) tasks.

470 **Pseudo-label-driven co-teaching.** The step involves selecting 64 samples with smaller losses for  
471 fine-tuning the proxies while ignoring the remaining 64 samples. To assess the effectiveness of  
472 this strategy, we calculate  $\mathcal{L}^{Sel}$ , the mean squared error (MSE) between the pseudo-labeled and  
473 ground truth scores of the selected 64 samples, and  $\mathcal{L}^{Ign}$ , the MSE for the ignored samples. These  
474 calculations are averaged over 50 steps. We find that for D’Kitty,  $\mathcal{L}^{Sel}$  is 0.124 lower than  $\mathcal{L}^{Ign}$  and  
475 for TF8, it’s 0.006 less than  $\mathcal{L}^{Ign}$ . These results validate the efficacy of this step, as the selected  
476 samples more closely align with the ground truth.

477 **Meta-learning-based sample reweighting.** In this step, we aim to assign larger weights to cleaner  
478 samples and smaller weights to noisier ones among the total of 64 samples. We measure the efficacy  
479 of this step by calculating  $\mathcal{L}^{Large}$ , the MSE between the pseudo-labeled and ground-truth scores of  
480 the 32 samples with larger weights, and  $\mathcal{L}^{Small}$ , the MSE for the 32 samples with smaller weights.  
481 These calculations are averaged over 50 steps. We observe that for D’Kitty,  $\mathcal{L}^{Large}$  is 0.010 lower  
482 than  $\mathcal{L}^{Ign}$ . For TF8,  $\mathcal{L}^{Large}$  is 0.005 less than  $\mathcal{L}^{Small}$ . These findings indicate that the samples with  
483 larger weights are indeed closer to the ground truth, substantiating the effectiveness of this step.

484 **A.5 Examining Hyperparameter Sensitivity Further**

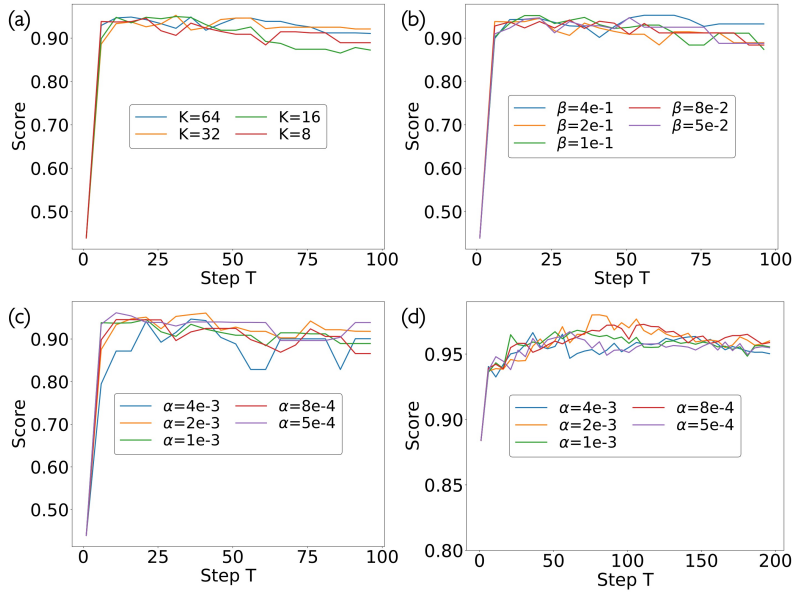

Figure 5: Extended Analysis on Hyperparameter Sensitivity.

485 Building on the analysis from Sec 4.6, we delve deeper into hyperparameter sensitivity, focusing on  
 486 the TF8 task. Specifically, we investigate the influence of the number of selected samples ( $K$ ) in the  
 487 first step, and the learning rate ( $\beta$ ) in the second step.

- 488 • Figure 5 (a) displays the 100<sup>th</sup> percentile normalized ground-truth score as a function of the time  
 489 step  $T$  for different  $K$  values (8, 16, 32, 64). ICT demonstrates stability over a specific range for  
 490 varying  $K$  values, showcasing its robustness. Notably, ICT reaches optimal designs around  $t = 20$   
 491 and maintains this level, further validating its resilience against different optimization steps  $T$ .
- 492 • Figure 5 (b) plots the 100<sup>th</sup> percentile normalized ground-truth score as a function of the learning  
 493 rate ( $\beta$ ) in TF8. ICT maintains a consistent performance across diverse  $\beta$  values, corroborating its  
 494 robustness concerning the hyperparameter  $\beta$  in TF8.

495 Furthermore, we evaluate the effect of the fine-tuning learning rate  $\alpha$  in both TF8 and D’Kitty  
 496 tasks. Figures 5 (c) and 5 (d) reveal a consistent performance across varied  $\alpha$  values for both tasks,  
 497 highlighting ICT’s robustness towards the fine-tuning learning rate.

498 **A.6 Limitation**

499 We validate the effectiveness of ICT across a broad spectrum of tasks. Nevertheless, certain evaluation  
 500 methodologies do not completely represent authentic situations. For instance, in the superconductor  
 501 task [5], we adhere to the established convention of utilizing a random forest regression model as  
 502 the oracle, in line with previous studies [1]. Regrettably, this model may not perfectly mirror the  
 503 complexities of real-world cases, resulting in discrepancies between our oracle and the ground-truth.  
 504 Future collaborations with domain experts can potentially refine these evaluation methods. Overall,  
 505 given the straightforward formulation of ICT, combined with empirical proof of its robustness and  
 506 effectiveness across diverse tasks in the design-bench [1], we maintain confidence in its capability to  
 507 effectively generalize to other scenarios.
